# Supplementary figures and images for: Prediction of α-Glucosidase Inhibitory Activity of LC-ESI-TQ-MS/MS-Identified Compounds from Tradescantia pallida Leaves
Source: MDPI journal article supplement (doi:10.3390/pharmaceutics14122578), 2022-11-23

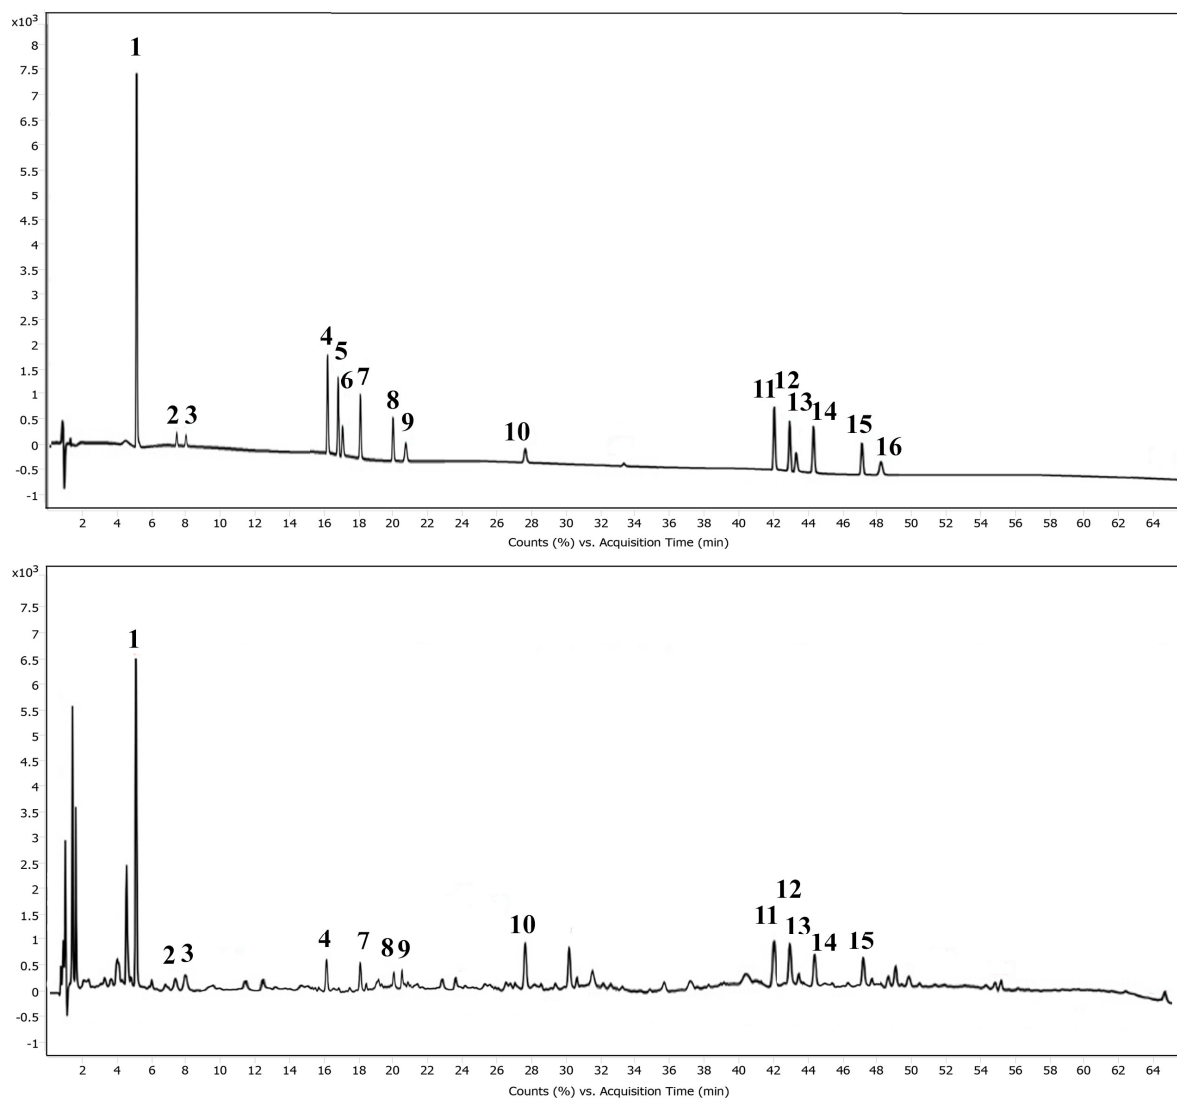

**Figure S1:** LC-ESI-TQ-MS/MS spectra of phenolic compounds identified from *Tradescantia pallida*.

Supplement: s1 [file s1]
